# Supplementary material
Source: PubMed Central journal article supplement (PMC5748384)

Supplementary Figure 1 The mRNA levels of STAM1, TSG101, RAB11, and RAB27A were not changed in H9C2 cells treated with IGF-1 (n=6) (PDF 22 kb)

### Supplementary Figure 1

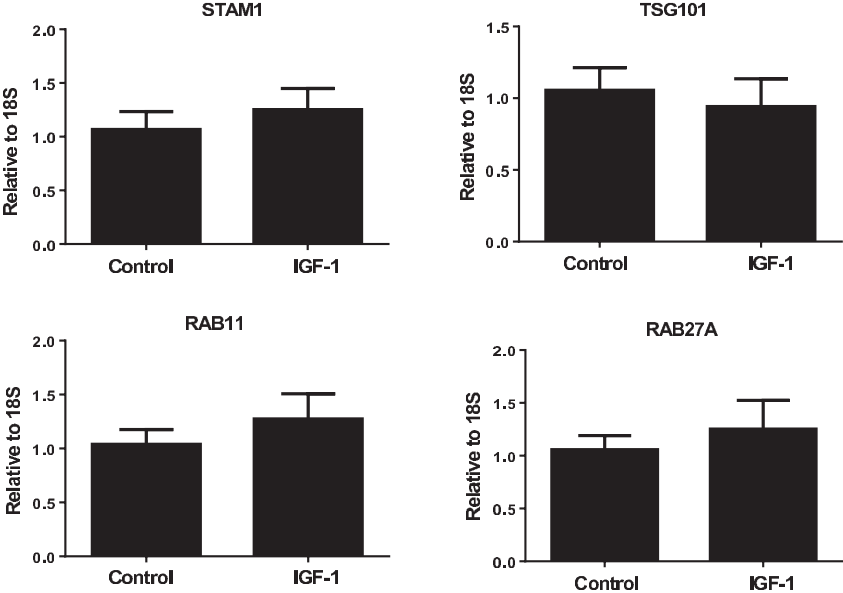

Supplement: NIHMS926571-supplement-Sup__Fig__1.pdf [file NIHMS926571-supplement-Sup__Fig__1.pdf]
